# Supplementary material for: Human H3N2 Influenza Viruses Isolated from 1968 To 2012 Show Varying Preference for Receptor Substructures with No Apparent Consequences for Disease or Spread
Source: PubMed Central journal article supplement (PMC3689742; doi:10.1371/journal.pone.0066325), 2013-06-21
Supplement: pone.0066325.s001.pdf [file pone.0066325.s001.pdf]

**Figure S1: Sequence alignment of HA1 of the viruses used in this study**

|                     | 10         | 20         | 30         | 40         | 50         | 60         | 70         | 80         | 90         | 100        | 110        |
|---------------------|------------|------------|------------|------------|------------|------------|------------|------------|------------|------------|------------|
| A/Albany/11/1968    | QDLPGNDNST | ATLCLGHHAV | PNGTLVKTTI | NDQIEVTNAT | ELVQSSSTGK | ICNNPHRILD | GIDCTLIDAL | LGDPHCDFVQ | NETWDLFVER | SKAFSNCYPY | DVPDYASLRS |
| A/BCM/2/1968        | .....      | .....      | .....      | .....      | .....      | .....      | .....      | .....      | .....      | .....      | .....      |
| A/Albany/1/1969     | .....      | .....      | .....      | D.....     | .....      | .....      | N.....     | .....      | D.....     | .....      | .....      |
| A/BCM/2/1969        | .....      | .....      | .....      | .....      | .....      | .....      | .....      | .....      | .....      | .....      | .....      |
| A/Albany/1/1970     | .....      | .....      | .....      | .....      | .....      | .....      | N.....     | .....      | D.....     | .....      | .....      |
| A/BCM/1/1970        | .....      | .....      | .....      | .....      | .....      | .....      | N.....     | .....      | D.....     | .....      | .....      |
| A/BCM/1/1972        | .F.....    | .....      | .....      | .....      | .....      | .....      | .....      | .....      | G.....     | .....      | .....      |
| A/BCM/1/1973        | .F.....    | .....      | .....      | .....      | .....      | .....      | .....      | .....      | G.....     | .....      | .....      |
| A/BCM/1/1974        | .F.....    | .....      | .....      | .....      | .....      | .....      | .....      | .....      | G.....     | .....      | .....      |
| A/Albany/42/1975    | .N.....    | .....      | .....      | .....      | .....      | .....      | N.....     | .....      | G.....     | .....      | .....      |
| A/BCM/3/1975        | .....      | .....      | .....      | .....      | .....      | D.....     | N.....     | .....      | G.....     | .....      | .....      |
| A/BCM/1/1976        | .....      | .....      | .....      | .....      | .....      | D.....     | N.....     | .....      | G.....     | .....      | .....      |
| A/BCM/11/1976       | .N.....    | .....      | .....      | .....      | R.....     | DS.....    | KN.....    | .....      | G.....     | .....      | .....      |
| A/BCM/3/1977        | .N.....    | .....      | .....      | .....      | R.....     | DS.....    | KN.....    | .....      | G.....     | .....      | .....      |
| A/BCM/1/1978        | .NF.....   | .....      | .....      | .....      | R.....     | DS.....    | KN.....    | .....      | G.....     | .....      | .....      |
| A/BCM/1/1980        | .N.....    | .....      | .....      | .....      | R.....     | DS.....    | KN.....    | V.....     | G.....     | .....      | .....      |
| A/BCM/1/1981        | .N.....    | .....      | .....      | .....      | R.....     | DS.....    | KN.....    | V.....     | G.....     | .....      | .....      |
| A/BCM/1/1982        | .N.....    | .....      | .....      | .....      | R.....     | DS.....    | KN.....    | V.....     | G.....     | K.....     | I.....     |
| A/Memphis/33/83     | .K.....    | .....      | .....      | .....      | R.....     | DS.....    | KN.....    | .....      | G.....     | .....      | .....      |
| A/Memphis/2/85      | .K.....    | .....      | .....      | .....      | R.....     | DS.....    | KN.....    | .....      | G.....     | .....      | .....      |
| A/Memphis/2/1986    | .K.....    | .....      | .....      | .....      | R.....     | DS.....    | KN.....    | .....      | G.....     | .....      | .....      |
| A/Memphis/3/88      | .K.....    | .....      | .....      | .....      | R.....     | DS.....    | KN.....    | .....      | G.....     | .....      | .....      |
| A/Memphis/7/90      | .K.....    | .....      | I.....     | .....      | R.....     | S.....     | KN.....    | .....      | S.....     | KE.....    | .....      |
| A/BCM/1/1991        | .K.....    | .....      | .....      | .....      | R.....     | DS.....    | KN.....    | .....      | G.....     | KE.....    | .....      |
| A/BCM/2/1992        | .K.....    | .....      | .....      | .....      | R.....     | DS.....    | KN.....    | .....      | G.....     | KE.....    | .....      |
| A/BCM/1/1993        | .K.....    | .....      | .....      | .....      | R.....     | DS.....    | KN.....    | .....      | G.....     | KE.....    | .....      |
| A/Memphis/7/94      | .K.....    | .....      | .....      | .....      | F.....     | R.....     | DS.....    | KN.....    | .....      | G.....     | KE.....    |
| A/New York/696/1994 | .K.....    | .....      | .....      | .....      | P.....     | R.....     | DS.....    | KN.....    | .....      | G.....     | KE.....    |
| A/Memphis/9/95      | .K.....    | .....      | .....      | .....      | N.P.....   | R.....     | DS.....    | KN.....    | .....      | G.....     | KE.....    |
| A/Memphis/9/1996    | .K.....    | .....      | .....      | .....      | I.....     | R.....     | DS.....    | KN.....    | .....      | G.....     | KE.....    |
| A/Oklahoma/3003/96  | .K.....    | .....      | .....      | .....      | G.....     | R.....     | DS.....    | KN.....    | .....      | G.....     | KE.....    |
| A/Oklahoma/5098/96  | .K.....    | .....      | .....      | .....      | R.....     | DS.....    | KN.....    | .....      | ?.....     | G.K.....   | KE.....    |
| A/Memphis/5/97      | .K.....    | .....      | .....      | .....      | R.....     | DG.....    | Q.....     | KN.....    | .....      | G.....     | KE.....    |
| A/Memphis/14/1998   | .KI.....   | .....      | .....      | .....      | F.....     | R.....     | DS.....    | EN.....    | .....      | G.....     | KE.....    |
| A/Memphis/49/99     | .K.V.....  | .....      | .....      | H.....     | R.....     | DS.....    | Q.....     | EN.....    | .....      | G.....     | KE.....    |
| A/BCM/1/2001        | .K.....    | .....      | .....      | .....      | R.....     | DS.....    | Q.....     | EN.....    | .....      | G.....     | KE.....    |
| A/BCM/1/2002        | .K.....    | .....      | .....      | .....      | SR.....    | DS.....    | Q.....     | EN.....    | .....      | G.....     | KE.....    |
| A/Memphis/27/2003   | .K.....    | .....      | I.....     | .....      | G.....     | DS.....    | Q.....     | EN.....    | .....      | Q.....     | G.....     |
| A/Oklahoma/323/03   | .K.....    | .....      | I.....     | .....      | G.....     | DS.....    | Q.....     | EN.....    | .....      | Q.....     | G.....     |
| A/Oklahoma/1992/05  | .K.....    | .....      | I.....     | .....      | I.....     | G.....     | DS.....    | Q.....     | EN.....    | .....      | Q.....     |
| A/Oklahoma/309/06   | .K.....    | .....      | I.....     | .....      | E.....     | DS.....    | Q.....     | EN.....    | .....      | Q.....     | G.....     |
| A/Oklahoma/483/08   | .KF.....   | .....      | I.....     | .....      | E.....     | DS.....    | Q.....     | EN.....    | .....      | Q.....     | G.....     |
| A/Oklahoma/5342/10  | .K.....    | .....      | I.....     | .....      | E.....     | S.....     | Q.....     | EN.....    | .....      | Q.....     | G.....     |
| A/Oklahoma/5386/10  | .K.....    | .....      | I.....     | .....      | E.....     | S.....     | Q.....     | EN.....    | .....      | Q.....     | G.....     |
| A/Oklahoma/2280/12  | .KI.....   | .....      | I.....     | .....      | E.....     | S.....     | Q.....     | EN.....    | .....      | Q.....     | G.....     |

|                     | 120         | 130        | 140        | 150        | 160        | 170        | 180        | 190        | 200        | 210        | 220             |
|---------------------|-------------|------------|------------|------------|------------|------------|------------|------------|------------|------------|-----------------|
| A/Albany/11/1968    | LVASSGTFLEF | ITEGFTWTGV | TQNGGSNACK | RPGSGGFFSR | LNWLTKSGST | YPVLNVTMPN | NDNFDKLYIW | GVHHPSTNQE | QTSLYVQASG | RVTVSTRRSQ | QTIIPNIGSR      |
| A/BCM/2/1968        |             |            |            |            |            |            |            |            |            |            |                 |
| A/Albany/1/1969     |             |            |            |            |            |            |            |            |            |            |                 |
| A/BCM/2/1969        |             |            |            |            |            |            |            |            |            |            |                 |
| A/Albany/1/1970     |             |            |            |            |            |            |            |            |            |            |                 |
| A/BCM/1/1970        |             |            |            |            |            |            |            |            |            |            |                 |
| A/BCM/1/1972        |             | .S.        |            | .D.        |            | .Y.        |            | .D.        |            | .K.        |                 |
| A/BCM/1/1973        |             | .N.        |            | .D.        |            | .Y.        |            | .D.        |            | .K.        |                 |
| A/BCM/1/1974        |             | .N..N.     |            | .N.        |            | .Y..T.     |            | .D.        | .N.        | .K.        | .T.             |
| A/Albany/42/1975    |             | .N..N.     |            | .D.        |            | .Y.        |            | .D.        | .N.        | .K.        | .V.             |
| A/BCM/3/1975        |             | .N..N.     |            | .S..DN.    |            | .Y.        | .Q.        | .S.        | .DK.       | .D.        | .K..K..V.       |
| A/BCM/1/1976        |             | .N..N.     |            | .S..DN.    |            | .Y.        | .Q.        | .S.        | .DK.       | .D.        | .K..K..V.       |
| A/BCM/11/1976       |             | .N..N.     |            | .Y..DNS.   |            | .YE.E.K    |            |            | .DK.       | .K.        | .I..K..V.       |
| A/BCM/3/1977        | .K.         | .N..N.     |            | .Y..DNS.   |            | .Y..E..    |            |            | .DK.       | .N.        | .K..V.          |
| A/BCM/1/1978        |             | .N..N.     |            | .Y..DNS.   |            | .YE.E.K    |            |            | .DK.       | .N.        | .K..V.          |
| A/BCM/1/1980        |             | .N.S.N.    | .S..Y.     | .SDNS.     |            | .YE.E.K    |            | .G.        | .DK.       | .N..R.     | .K..V.          |
| A/BCM/1/1981        |             | .N.S.N.    | .S..Y.     | .SDNS.     |            | .YE.E.K    |            | .G.        | .DK.       | .N..R.     | .K..V.          |
| A/BCM/1/1982        |             | .N.S.N.    | .S..Y.     | .SDNS.     |            | .YE.E.K    |            | .G.        | .DK.       | .N..R.     | .K.N..V.        |
| A/Memphis/33/83     |             | .N..N.     | .S..Y.     | .SVNS.     |            | .YE.E.K    |            | .GK.       | .DK.       | .N..R.     | .K..V.          |
| A/Memphis/2/85      |             | .N..N.     | .S..Y.     | .SVNS.     |            | .YE.E.K    | .A.        | .GK.       | .DK.       | .N..R.     | .K..V.          |
| A/Memphis/2/1986    |             | .N..N.     | .S..YT.    | .SVNS.     |            | .YE.E.K    | .A.        | .GK.       | .DK.       | .N..R.     | .K..V..P.       |
| A/Memphis/3/88      |             | .N.D.N.    | .S..Y.     | .SVNS.     |            | .HE.EYK    | .A.        | .GK.       | .DR.       | .N..R.     | .K..V.          |
| A/Memphis/7/90      |             | .N.D.N.    | A.S..Y.    | .SVNS.     |            | .HE.EYK    | .A.        | .GK.       | .DR.       | .N..R.     | .K..V.          |
| A/BCM/1/1991        |             | TN.D.N.    | A.S.E.Y.   | .SVKS.     |            | .HE.DYK    | .A.        | .GK.       | .DR.       | .N..R.     | .K..V.          |
| A/BCM/2/1992        |             | TN.D.N.    | A.S..Y.    | .SVKS.     |            | .HE.DYK    | .A.        | .GK.       | .DR.       | .N..R.     | .K..V.          |
| A/BCM/1/1993        |             | .N.D.N.    | A.D.K.Y.   | .SVNS.     |            | .H.LEYK    | .A.        | .GK.       | .DSD       | .R.        | .K..V.          |
| A/Memphis/7/94      |             | .N.D.N.    | A.D.K.Y.   | .SVNS.     |            | .H.LEYK    | .A.        | .GK.       | .DSD       | .R.        | .K..V..F.       |
| A/New York/696/1994 |             | TN.N.N.    | A.D.K.Y.   | .SVNS.     |            | .H.LEYK    | .A.        | .GK.       | .DSD       | .R.        | .K..K..V..D..Y. |
| A/Memphis/9/95      |             | TN.N.N.    | A.D.K.Y.   | .SVNS.     |            | .H.LEYK    | .A.        | .GK.       | .DSD       | .R.        | .K..K..V..D..Y. |
| A/Memphis/9/1996    |             | TN..N.     | A.D.K.Y.   | .SVNS.     |            | .H.LEYK    | .A.        | .K.        | .DSD       |            | .K..V.          |
| A/Oklahoma/3003/96  |             | NN.S.N.    | A..T.D.    | .RSVKS.    |            | .H.LEYK    | .A..A.     | .K.        | .DSV       |            | .K..V.          |
| A/Oklahoma/5098/96  | ?           | TN..N.     | A.D.T.D.R  | .SVKS..K   |            | .H.LEYK    | .A.K.      | .K.        | .DSV       |            | .K..V..?        |
| A/Memphis/5/97      |             | TN.S.N.    | A..T.Y.    | .SVKS.     |            | .H.LEYK    | .A.        | .K.        | .DSD       | .S.        | .K..VT.         |
| A/Memphis/14/1998   |             | NN.S.N.    | A..T.Y.    | .RSIKS.    |            | .HQLKYK    | .A.        | .K.        | .DSD       | .A.        | .K..V.          |
| A/Memphis/49/99     |             | NN.S.N.    | A..T.S.Q   | .RSIKS.    |            | .HQLKYK    | .A.        | .EK.       | .DSD       | .I..A.     | .K..V.          |
| A/BCM/1/2001        |             | NN.S.N.    | A..T.S.    | .RSDKS.    |            | .HQLKYK    | .A.        | .EK.       | .G.DSD     | .I..A.     | .K..V..G        |
| A/BCM/1/2002        |             | NS.S.N.    | A..T.S.    | .RSDKS.    |            | .HQLKYK    | .A.        | .EK.       | .G.DSD     | .I..A.     | .K..V.          |
| A/Memphis/27/2003   |             | NN.S.D.    | A..T.S.    | .RSNKS.    |            | .HLKYK     | .A.        | .EK.       | .G.DSD     | .I..A.     | .I..K..V.       |
| A/Oklahoma/323/03   |             | NN.S.D.    | A..T.S.    | .RSNKS.    |            | .HLKYK     | .A.        | .EK.       | .G.DSD     | .I..A.     | .I..K..V.       |
| A/Oklahoma/1992/05  |             | NN.S.N.    | A..T.S.    | .RSNNS.    |            | .HLKFK     | .A.        | .EK.       | .G.DND     | .I..A.     | .I..K..V.       |
| A/Oklahoma/309/06   |             | NN.S.N.    | A..T.SS.   | .RSNNS.    |            | .HLKFK     | .A.        | .EK.       | .G.DND     | .IF..A.    | .I..K..V.       |
| A/Oklahoma/483/08   |             | NN.S.N.    | A..T.S.I   | .RSNNS.    |            | .H.KFK     | .A.        | .E.        | .G.DND     | .IF..A.    | .I..K..V.       |
| A/Oklahoma/5342/10  |             | NN.S.N.    | A..T.S.I   | .RSNNS.    |            | .HLNFK     | .A.        | .EQ.       | .G.DKD     | .IF..A.A.  | .I..K..AV.      |
| A/Oklahoma/5386/10  |             | NN.S.N.    | A..T.S.I   | .RSNNS.    |            | .HLNFK     | .A.        | .EQ.       | .G.DKD     | .IF..A.A.  | .I..K..AV.      |
| A/Oklahoma/2280/12  |             | NN.S.N.    | A..T.S.I   | .RSNNS.    |            | .HLNFK     | .A.        | .EQ.       | .G.DKD     | .IF..A.A.  | .I..K..AV.      |

|                     | 230          | 240        | 250        | 260        | 270        | 280         | 290        | 300        | 310        | 320        | 330        |
|---------------------|--------------|------------|------------|------------|------------|-------------|------------|------------|------------|------------|------------|
| A/Albany/11/1968    | PWVRGLSSRI   | SIYWTIVKPG | DVLVINSNGN | LIAPRGYFKM | RTGKSSIMRS | DAPIDTCISE  | CITPNGSIPN | DKPFQNVNKI | TYGACPKYVK | QNTLKLATGM | RNVPEKQTRG |
| A/BCM/2/1968        | .....        | .....      | .....      | .....      | .....      | .....       | .....      | .....      | .....      | .....      | .....      |
| A/Albany/1/1969     | .....        | .....      | .....      | .....      | .....      | .....       | .....      | .....      | .....      | .....      | .....      |
| A/BCM/2/1969        | .....        | .....      | .....      | .....      | .....      | .....       | .....      | .....      | .....      | .....      | .....      |
| A/Albany/1/1970     | .....        | .....      | .....      | .....      | .....      | .....       | .....      | .....      | .....      | .....      | .....      |
| A/BCM/1/1970        | .....        | .....      | .....      | .....      | .....      | .....       | .....      | .....      | .....      | .....      | .....?     |
| A/BCM/1/1972        | .....        | .....      | I.....     | .....      | .....      | G.....      | .....      | .....      | .....      | .....      | .....?     |
| A/BCM/1/1973        | .....        | .....      | I.....     | .....      | .....      | G.....      | .....      | .....      | .....      | .....      | .....      |
| A/BCM/1/1974        | .....        | .....      | I.....     | .....      | .....      | G.....      | .....      | .....      | .....      | .....      | .....      |
| A/Albany/42/1975    | .....        | .....      | I.....     | H.....     | .....      | G.S.....    | .....      | .....      | .....      | .....      | .....      |
| A/BCM/3/1975        | .....V       | .....      | I.....     | .....      | .....      | G.S.....    | .....      | .....      | .....      | .....      | .....      |
| A/BCM/1/1976        | .....V       | .....      | I.....     | .....      | .....      | G.S.....    | .....      | .....      | .....      | .....      | .....      |
| A/BCM/11/1976       | .....        | .....      | IL.....    | V.....     | .....      | G.S.....    | .....      | .....      | .....      | .....      | .....      |
| A/BCM/3/1977        | .....        | .....      | IL.....    | I.....     | .....      | G.S.....    | .....      | .....      | .....      | .....      | .....K.    |
| A/BCM/1/1978        | .....        | .....      | IL.....    | I.....     | .....      | G.S.....    | .....      | .....      | .....      | .....      | .....      |
| A/BCM/1/1980        | .....        | .....      | IL.....    | I.....     | .....      | G.S.....    | .....      | .....      | .....      | .....      | .....      |
| A/BCM/1/1981        | .....        | .....      | IL.....    | I.....     | .....      | G.S.....    | .....      | .....      | .....      | .....      | .....      |
| A/BCM/1/1982        | .....        | .....      | IL.....    | I.N.....   | .....      | G.S.....    | .....      | .....      | T.....     | .....      | .....      |
| A/Memphis/33/83     | .....        | .....      | IL..T.     | I.....     | .....      | G.S.....    | .....      | .....      | R.....     | .....      | .....      |
| A/Memphis/2/85      | .....        | .....      | IL..T.     | I.....     | .....      | G.S.....    | .....      | .....      | R.....     | .....      | .....      |
| A/Memphis/2/1986    | .....        | .....      | IL..T.     | I.....     | .....      | G.S.G.....  | .....      | .....      | R.....     | .....      | .....      |
| A/Memphis/3/88      | .....        | .....      | IL..T.     | I.....     | .....      | G.S.....    | .....      | .....      | R.....     | .....      | .....      |
| A/Memphis/7/90      | .....        | .....      | IL..T.     | I.....     | .....      | G.S.....    | .....      | R.....     | R.....     | .....      | .....      |
| A/BCM/1/1991        | .....        | .....      | IL..T.     | I.....     | .....      | G.S.....    | .....      | R.....     | R.....     | .....      | .....      |
| A/BCM/2/1992        | .....        | .....      | IL..T.     | I.....     | .....      | G.S.....    | .....      | R.....     | R.....     | .....      | .....      |
| A/BCM/1/1993        | .....        | .....      | IL..T.     | I.N.....   | .....      | GN.R.....   | .....      | .....      | R.R.....   | .....      | .....      |
| A/Memphis/7/94      | .....        | .....      | IL..T.     | I.N.....   | .....      | GN.S.....   | .....      | R.....     | R.....     | .....      | .....      |
| A/New York/696/1994 | .....        | .....      | IL..T.     | I.N.....   | .....      | GN.S.....   | .....      | R.....     | R.....     | .....      | .....      |
| A/Memphis/9/95      | .....        | .....      | IL..T.     | I.N.....   | .....      | GN.S.....   | .....      | R.....     | R.....     | .....      | .....      |
| A/Memphis/9/1996    | .....I       | .....      | IL..T.     | I.N.....   | .....      | N.N.....    | .....      | R.....     | R.....     | .....      | .....      |
| A/Oklahoma/3003/96  | .....I       | .....      | IL..T.     | I.S.....   | .....      | N.N.....    | .....      | R.....     | R.....     | .....      | .....      |
| A/Oklahoma/5098/96  | .....V       | .....      | IL..T.     | I.S.V..... | .....      | N.N.....    | .....      | R.....     | R.R.....   | .....      | .....      |
| A/Memphis/5/97      | .....V       | .....      | IL..T.     | I.R.....   | .....      | N.N.....    | .....      | R.....     | R.....     | .....      | .....      |
| A/Memphis/14/1998   | .....V       | .....      | IL..T.     | I.S.....   | .....      | GK.N.....   | .....      | R.....     | R.....     | .....      | .....      |
| A/Memphis/49/99     | .....V       | .....      | IL..T.     | I.S.....   | N.....     | GK.N.....   | .....      | R.....     | R.....     | .....      | .....      |
| A/BCM/1/2001        | .....V       | .....      | IL..T.     | I.S.....   | .....      | GK.N.....   | .....      | R.....     | P.R.....   | .....      | .....      |
| A/BCM/1/2002        | .....G.V     | .....      | IL..T.     | I.S.....   | .....      | GK.N.....   | .....      | R.....     | R.....     | .....      | .....      |
| A/Memphis/27/2003   | .....R.DV    | .....      | IL..T.     | I.S.....   | .....      | GK.N.....   | .....      | R.....     | R.I.....   | .....      | .....      |
| A/Oklahoma/323/03   | .....R.DI    | .....      | IL..T.     | I.S.....   | .....      | GK.N.....   | .....      | R.....     | R.....     | .....      | .....      |
| A/Oklahoma/1992/05  | .....R.DIP   | .....      | IL..T.     | I.S.....   | .....      | GK.N.....   | .....      | R.....     | R.....     | .....      | .....      |
| A/Oklahoma/309/06   | .....R.NIP   | .....      | IL..T.     | I.S.....   | .....      | GK.N.....   | .....      | R.....     | R.....     | .....      | .....      |
| A/Oklahoma/483/08   | .....R.DIP   | .....      | IL..T.     | I.S.....   | .....      | GK.N.....   | .....      | R.....     | R.....     | .....      | .....      |
| A/Oklahoma/5342/10  | .....R.DIP.V | .....      | IL..T.     | I.S.....   | .....      | GK.N.A..... | .....      | R.....     | R.....     | .....      | .....      |
| A/Oklahoma/5386/10  | .....R.DIP.V | .....      | IL..T.     | I.S.....   | .....      | GK.N.A..... | .....      | R.....     | R.....     | .....      | .....      |
| A/Oklahoma/2280/12  | .....R.NIP.V | .....      | IL..T.     | I.S.....   | .....      | GK.N.A..... | .....      | R.....     | R.....     | .....      | .....      |

Generated by the Influenza Sequence Database

Macken, C., Lu, H., Goodman, J., & Boykin, L., "The value of a database in surveillance and vaccine selection." in *Options for the Control of Influenza IV*. A.D.M.E. Osterhaus, N. Cox & A.W. Hampson (Eds.) Amsterdam: Elsevier Science, 2001, 103-106.

A dot indicates the amino acid is the same as on the top line. Sequons for N-linked glycosylation are highlighted in yellow.
